# Supplementary material for: Potential urine biomarkers from a high throughput metabolomics study of severe sepsis in a large Asian cohort
Source: Royal Society of Chemistry journal article supplement (doi:10.1039/c5ra19875e), 2015-01-01
Supplement: c5ra19875e1.pdf [file c5ra19875e1.pdf]

**Table 1.** Clinical characteristics of the severe sepsis patients

| <b>Parameter</b>       | <b>Healthy volunteers (n = 1346)</b> | <b>SS Patients (n = 1282)</b> | <b>P value</b> |
|------------------------|--------------------------------------|-------------------------------|----------------|
| Age, years             | 55.3 ± 10.2                          | 57.2 ± 8.8                    | 0.33           |
| Sex (male/female)      | 660/686                              | 640/642                       | 0.72           |
| BMI, kg/m <sup>2</sup> | 24.15 ± 1.27                         | 25.32 ± 3.52                  | 0.69           |
| DBP, mmHg              | 75.13 ± 8.16                         | 76.44 ± 8.21                  | 0.49           |
| SBP, mmHg              | 147.10 ± 22.31                       | 145.09 ± 23.38                | 0.66           |
| Serum FBG, mmol/L      | 5.7 ± 1.3                            | 5.9 ± 1.5                     | 0.19           |
| Serum TG, mmol/L       | 2.5 ± 0.4                            | 1.8 ± 0.3                     | 0.04           |
| Serum TC, mmol/L       | 4.7 ± 0.6                            | 4.8 ± 0.7                     | 0.53           |
| Serum insulin, mmol/L  | 12.4 ± 3.7                           | 25.9 ± 6.1                    | 0.0042         |
| PCT, ng/ml             | 10.3 ± 2.5                           | 5.7 ± 1.6                     | 0.0006         |
| ISS                    | 54.6 ± 7.2                           | 33.5 ± 7.7                    | 0.0008         |

Note: A-AP, A-amyloid protein; BMI, body mass index; DBP, diastolic blood pressure; FBG, fasting (2 hours postprandial) blood glucose; SBP, systolic blood pressure; TC, total cholesterol; TG, triglycerides; ISS: Injury severity score. The p values less than 0.05 were considered significant.

**Table S2.** Information of SS biomarkers detected by UPLC-Q-TOF/MS in positive ion mode

| No | VIP   | Rt   | m/z      | Formula    | Mass Error (ppm) | Description     | Anova (p) | Trend |
|----|-------|------|----------|------------|------------------|-----------------|-----------|-------|
| 1  | 14.34 | 3.51 | 190.0567 | C10H7NO3   | -2.80            | Kynurenic acid  | 0.0002    | ↓     |
| 2  | 14.05 | 4.09 | 180.0734 | C9H9NO3    | -2.62            | Hippuric acid   | 0.0003    | ↑     |
| 3  | 11.52 | 4.65 | 76.0469  | C2H5NO2    | -1.08            | Glycine         | 0.0008    | ↓     |
| 4  | 11.11 | 0.86 | 259.0974 | C10H14N2O6 | -0.70            | 3-Methyluridine | 0.0004    | ↑     |
| 5  | 11.07 | 7.27 | 164.0480 | C5H9NO3S   | -3.81            | Acetylcysteine  | 0.0004    | ↑     |

**Table S3.** ROC curve analysis of potential biomarkers in SS detected by UPLC/MS

| No | Metabolite      | AUC   | Sensitivity (%) | Specificity (%) |
|----|-----------------|-------|-----------------|-----------------|
| 1  | Kynurenic acid  | 0.985 | 96.2            | 97.0            |
| 2  | Hippuric acid   | 0.905 | 93.1            | 87.2            |
| 3  | Glycine         | 0.963 | 83.7            | 89.3            |
| 4  | 3-Methyluridine | 0.861 | 90.3            | 89.7            |
| 5  | Acetylcysteine  | 0.811 | 80.2            | 85.5            |
